# Supplementary material for: Facile synthesis of hollow mesoporous zinc silicate nanoparticles using a dual surfactant system
Source: Royal Society of Chemistry journal article supplement (doi:10.1039/c6ra21255g), 2016-01-01
Supplement: c6ra21255g1.pdf [file c6ra21255g1.pdf]

Supplementary Information for

**Facile synthesis of hollow mesoporous zinc silicate nanoparticles via a dual surfactant system**

Kiju Um, Hochan Chang and Kangtaek Lee\*

Department of Chemical and Biomolecular Engineering, Yonsei University, Seoul 03722, Republic of Korea.

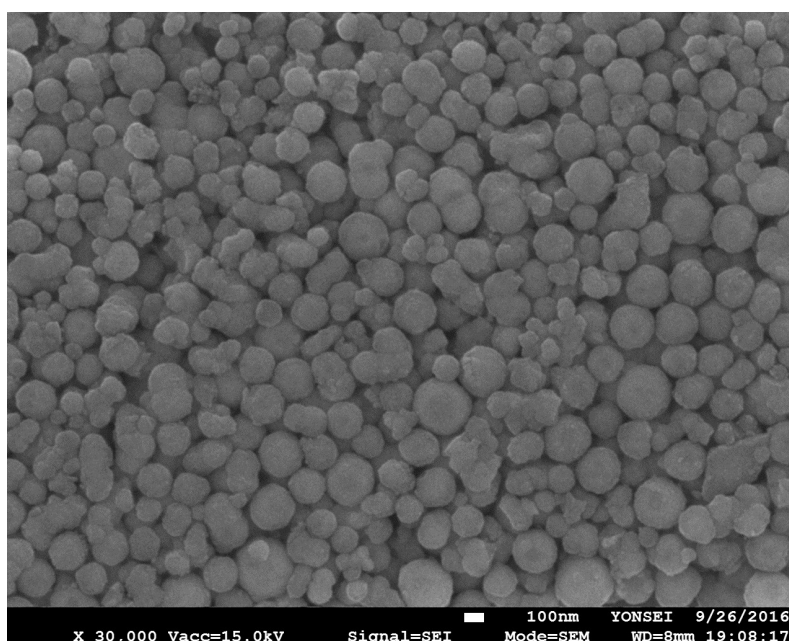

**Fig. S1** SEM image of the HMZSNs
